# Supplementary material
Source: publisher figshare collection journal article supplement (https://acs.figshare.com/ndownloader/files/13117472)
Supplement: Supplementary file 1 [file 13117472]

## **Supporting Information**

# **Distinctive Performance of Gemini Surfactant in the Preparation of Hierarchically Porous carbons via High Internal Phase Emulsion Template**

Yulai Zhao, Zhuang Zhao, Jing Zhang, Mengzhi Wei, Longqiang Xiao, Linxi Hou \*

Department of Materials-Oriented Chemical Engineering, College of Chemical Engineering,  
Fuzhou University, Fuzhou 350116, China.

Pages: 7 (including cover page); Figures: 9; Tables: 1

**Table S1.** Chemical formulas for the preparation of polyHIPEs

| Samples  | Water phase<br>(external phase) |                                     | Oil phase<br>(Internal phase) |
|----------|---------------------------------|-------------------------------------|-------------------------------|
|          | Emulsifiers                     | Resorcinol-formaldehyde<br>solution | Liquid paraffin               |
| SDLC-1.5 | SDLC, 0.15 g                    | 10 g                                | 30 g                          |
| SDLC-3   | SDLC, 0.3 g                     | 10 g                                | 30 g                          |
| SDLC-5   | SDLC, 0.5 g                     | 10 g                                | 30 g                          |
| TW20-1.5 | Tween, 0.15 g                   | 10 g                                | 30 g                          |
| TW20-3   | Tween, 0.3 g                    | 10 g                                | 30 g                          |
| TW20-5   | Tween, 0.5 g                    | 10 g                                | 30 g                          |
| CTAB-1.5 | CTAB, 0.15 g                    | 10 g                                | 30 g                          |
| CTAB-3   | CTAB, 0.3 g                     | 10 g                                | 30 g                          |
| CTAB-5   | CTAB, 0.5 g                     | 10 g                                | 30 g                          |

<sup>a</sup> Resorcinol-formaldehyde precursor solutions consist of formaldehyde, resorcinol and sodium carbonate with a molar ratio of 2:1:0.002 in deionized water.

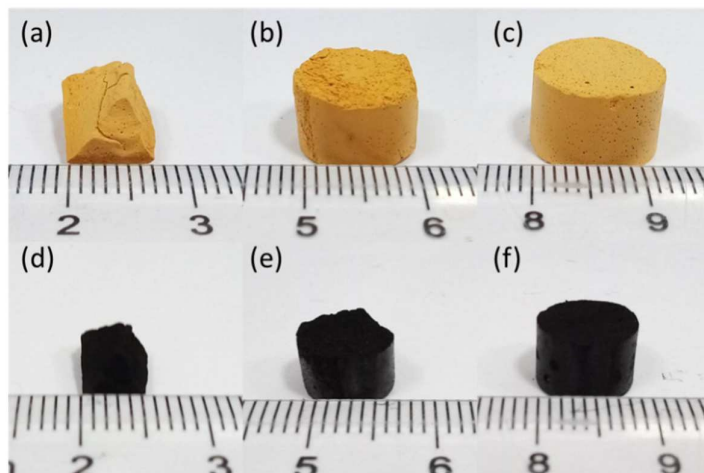

**Figure S1.** Photographs of polyHIPEs before (a~c) and after pyrolysis (d~f) obtained using different SDLC concentrations: (a, d) 1.5wt%, (b, e) 3wt% and (c, f) 5wt%.

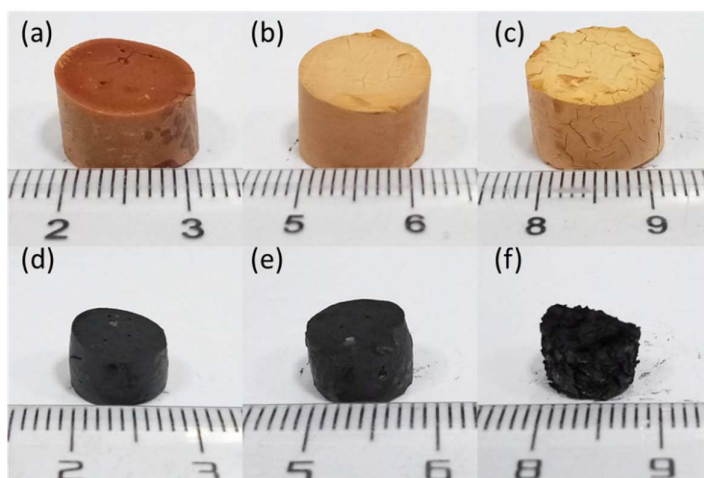

**Figure S2.** Photographs of polyHIPEs before (a~c) and after pyrolysis (d~f) obtained using different tween-20 concentrations: (a, d) 1.5wt%, (b, e) 3wt% and (c, f) 5wt%.

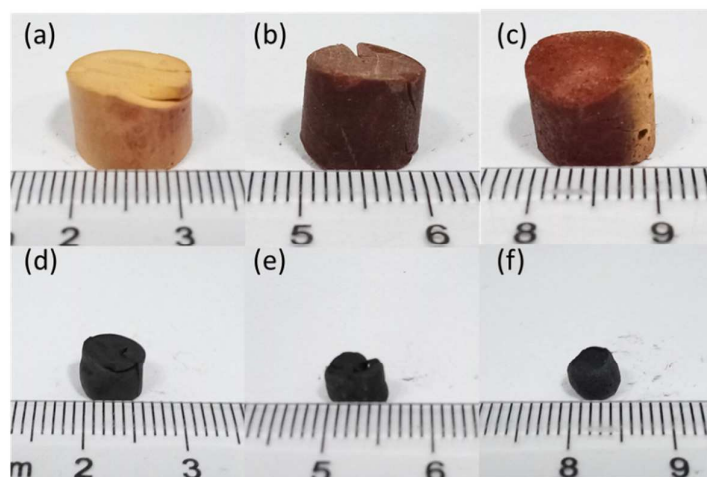

**Figure S3.** Photographs of polyHIPEs before (a~c) and after pyrolysis (d~f) obtained using different CTAB concentrations: (a, d) 1.5wt%, (b, e) 3wt% and (c, f) 5wt%.

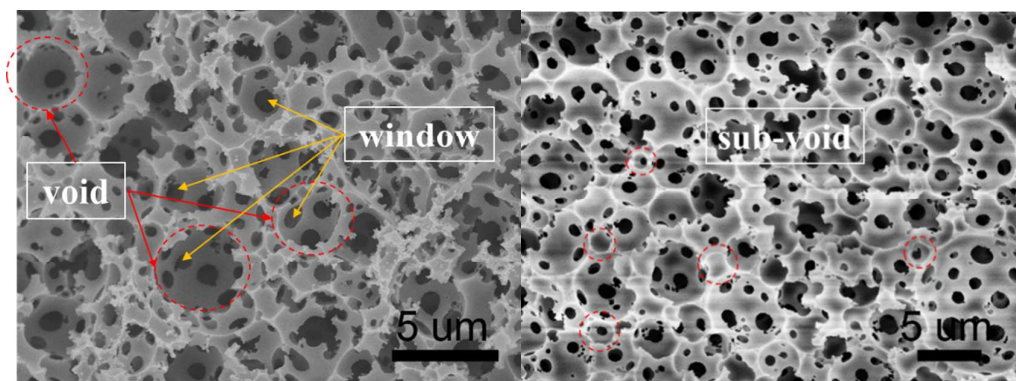

**Figure S4.** Illustration of the void, sub-void and window structures of polyHIPEs.

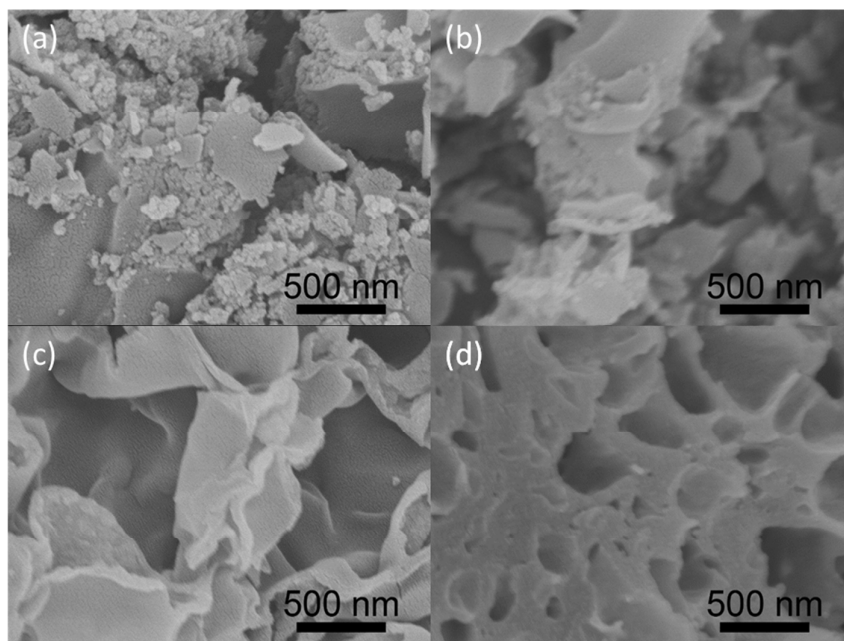

**Figure S5.** High resolution SEM images of carboHIPEs obtained using different emulsifiers: (a) 1.5 wt% TW20, (b) 3 wt% TW20, (c) 1.5 wt% CTAB and (d) 3 wt% CTAB.

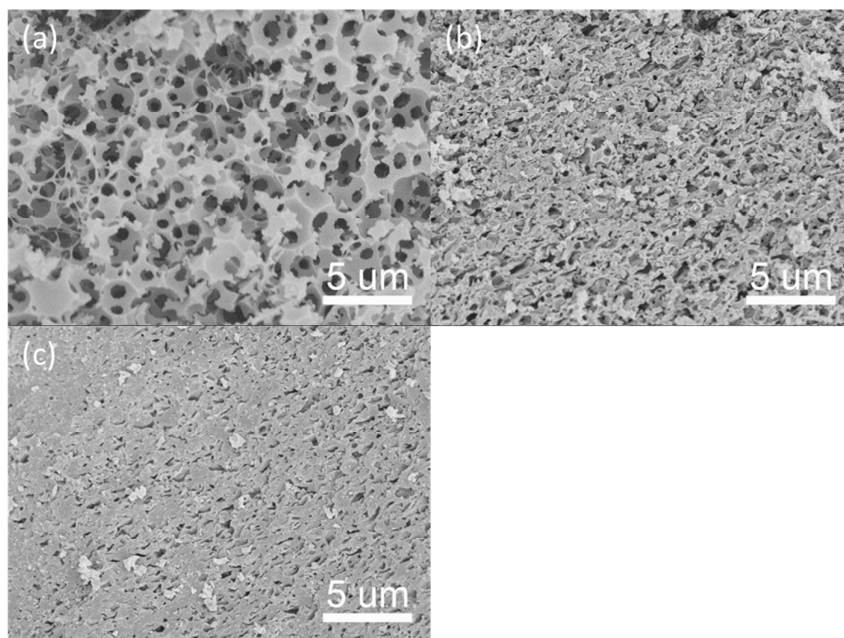

**Figure S6.** SEM images of activated carboHIPEs: (a) SDLC-5AC, (b) TW20-5AC and (c) CTAB-5AC.

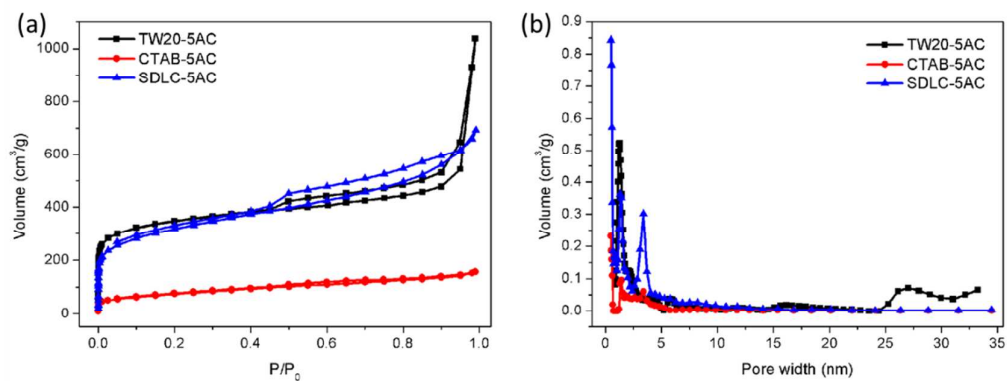

**Figure S7.** (a) N<sub>2</sub> adsorption/desorption isotherms and (b) pore size distributions of TW20-5AC, CTAB-5AC and SDLC-5AC.

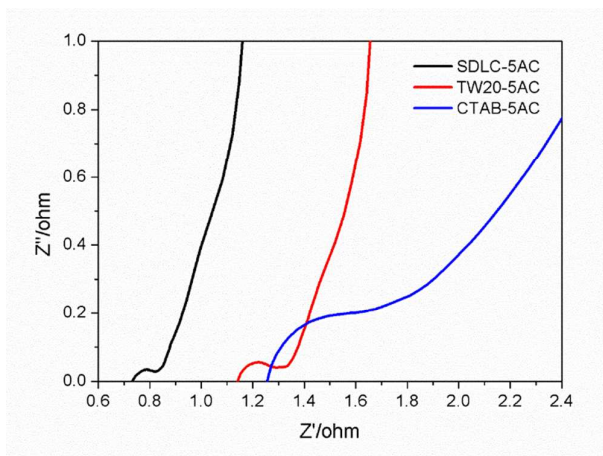

**Figure S8.** Nyquist plots of TW20-5AC, CTAB-5AC and SDLC-5AC.

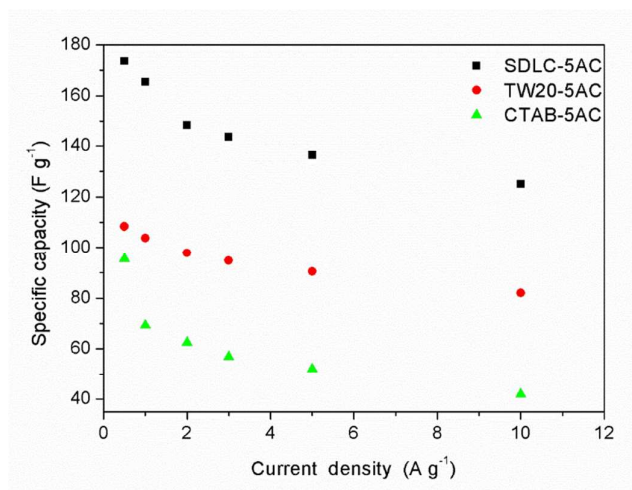

**Figure S9.** Dependences of specific capacitances on the current densities of TW20-5AC, CTAB-5AC and SDLC-5AC.
